# Supplementary material for: An anterior signaling center patterns and sizes the anterior neuroectoderm of the sea urchin embryo
Source: Oxford University Press journal article supplement (doi:10.1242/dev.128165), 2016-01-01
Supplement: dev128165supp.pdf [file dev128165supp.pdf]

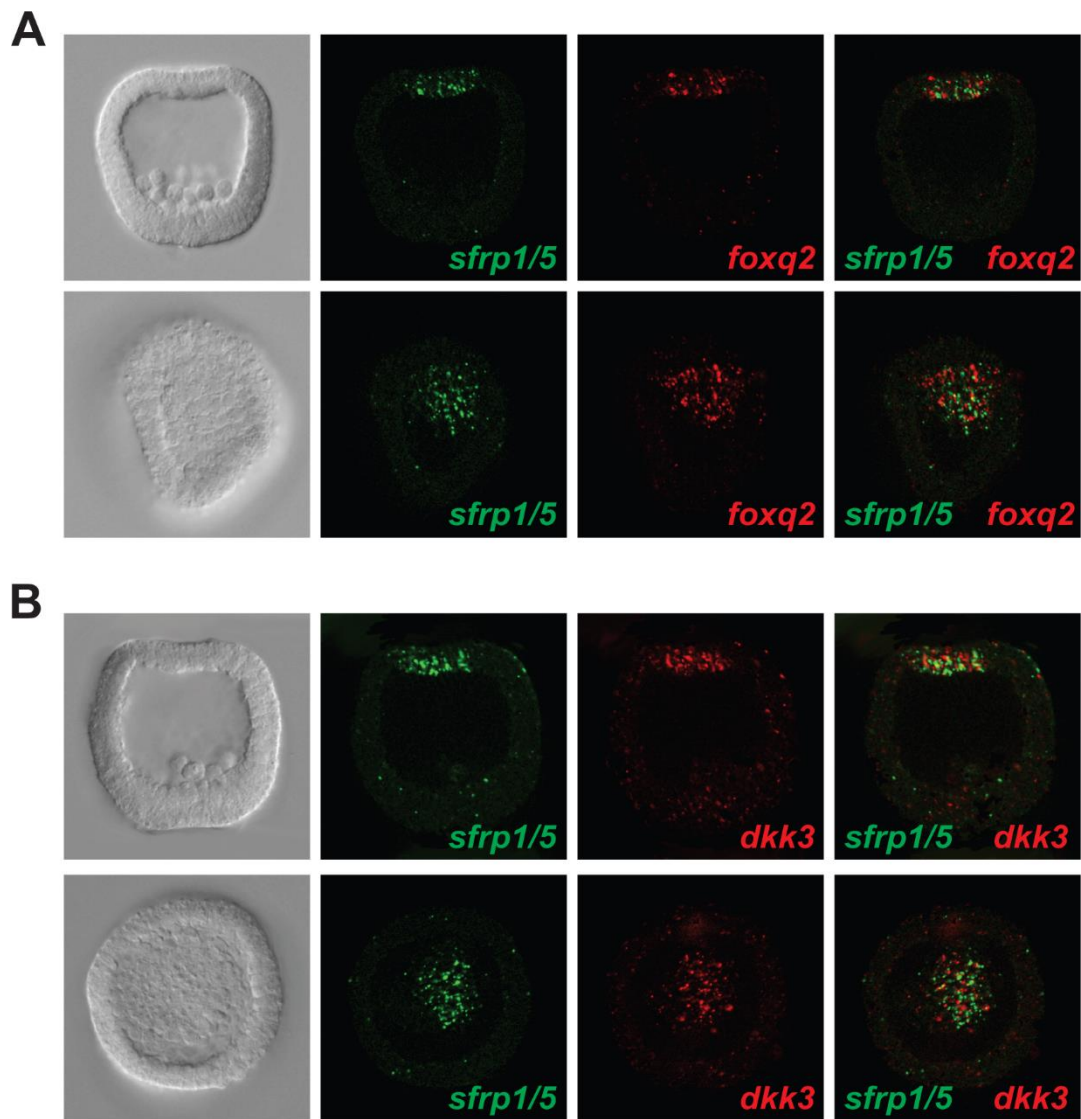

**Figure S1. Congruent expression of *foxq2*, *sfrp1/5* and *dkk3*.** (A) Two-color in situ hybridization assay for *sfrp1/5* (green) and *foxq2* (red) mRNA transcripts in mesenchyme blastula staged embryos (24 hpf). (B) Two-color in situ hybridization assay for *sfrp1/5* (green) and *dkk3* (red) mRNA transcripts in mesenchyme blastula staged embryos.

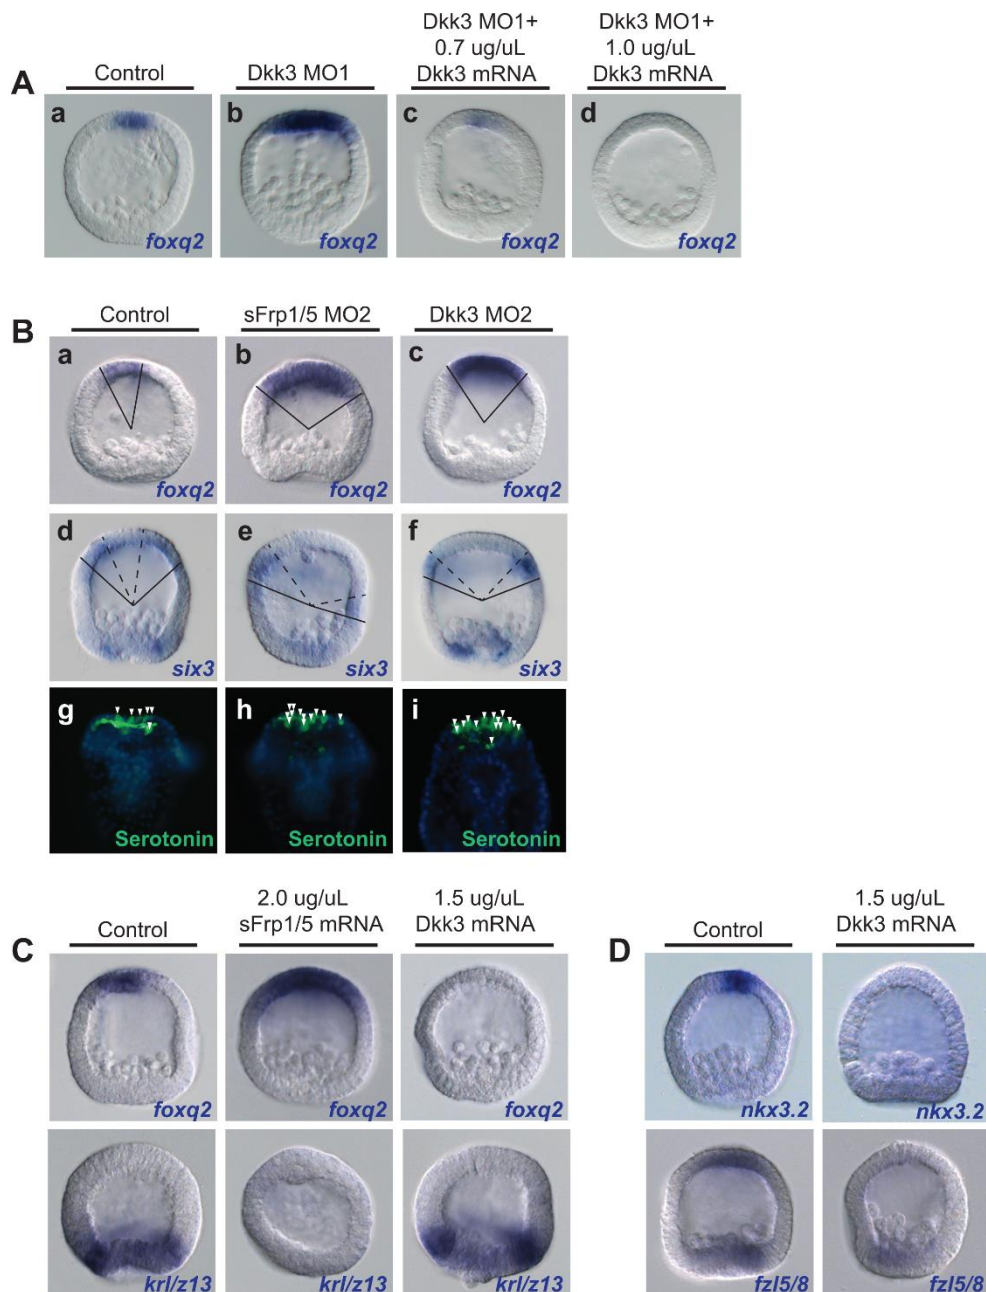

**Figure S2. Additional morpholino and overexpression phenotypes.** (A) Dkk3 overexpression rescues *foxq2* expression in embryos injected with Dkk3 MO1, which cannot bind to *dkk3* mRNA. (B) The ANE territory is expanded in embryos injected with sFrp1/5 Morpholino 2 and Dkk3 Morpholino 2. (Ba-f) The solid lines emanating from the center of the embryo mark the most posterior expression of *foxq2* and *six3*. The dotted lines originating from the center of the embryo indicate the anterior-most expression of the *six3* ring. (Bg-i) Serotonergic neurons (green) in control. sFrp1/5 and Dkk3 morpholino 2 knockdown 96 hpf pluteus larvae. Control = 5.95, n = 21; sFRP1/5 MO2 = 10.5 serotonergic neurons, n = 23; Dkk3 MO2 = 11.52 serotonergic neurons, n = 23. (C) *foxq2* is expanded (a, b) and the endomesoderm marker *krl/z13* is down regulated (d,e) in embryos injected with sFRP1/5 mRNA. *foxq2* is down regulated (a, c) and the endomesoderm marker *krl/z13* is unaffected (d, f) in embryos injected with Dkk3 mRNA. (D) The ANE regulatory network genes, *nkx3.2* and *fzl5/8*, are down regulated in embryos injected with Dkk3 mRNA. MO; morpholino.

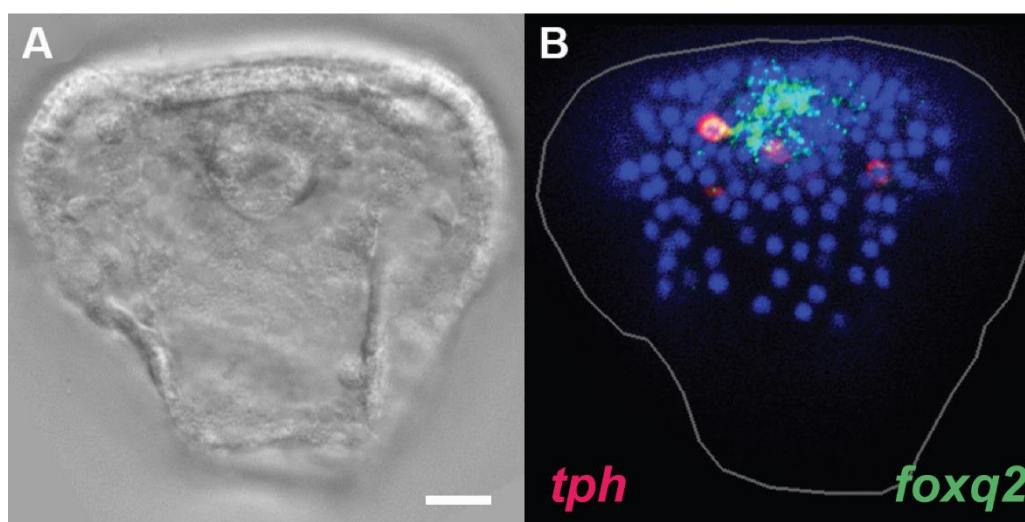

**Figure S3. Serotonergic neural cells appear at the dorsal edge of FoxQ2-expressing cells in the ANE.** A) DIC image of a gastrula stage (45hpf) embryo. Anterior view, dorsal is to the bottom. B) Whole mount fluorescence in situ hybridization for a serotonergic neural cell marker tryptophan hydroxylase (Tph) (red) and FoxQ2 (green) in the same embryo. Nuclei were labeled with DAPI (blue). Shown is a stack of optical sections through the animal pole. The white bar in A represents 20  $\mu\text{m}$ .
